# Supplementary material for: Do intense weather events influence dogs' and cats' behavior? Analysis of owner reported data in Italy
Source: Frontiers journal article supplement (doi:10.3389/fvets.2022.973574), 2022-09-02
Supplement: Data_Sheet_2.PDF [file Data_Sheet_2.PDF]

Supplementary materials S2: answer type for each questionnaire question

**DOG QUESTIONNAIRE**

| During the change of seasons, when the <b>temperature rises</b> , do you observe: |               |            |               |                     |            |
|-----------------------------------------------------------------------------------|---------------|------------|---------------|---------------------|------------|
|                                                                                   | Never (1)     | Rarely (2) | Sometimes (3) | Very frequently (4) | Always (5) |
| A decrease in walks frequency                                                     |               |            |               |                     |            |
| An increase in walks frequency                                                    |               |            |               |                     |            |
| A decrease of the walk's duration                                                 |               |            |               |                     |            |
| An increase of the walk's duration                                                |               |            |               |                     |            |
| A decrease of dog's appetite                                                      |               |            |               |                     |            |
| An increase of dog's appetite                                                     |               |            |               |                     |            |
| A decrease in dog's activity level                                                |               |            |               |                     |            |
| An increase in dog's activity level                                               |               |            |               |                     |            |
| A decrease in dog's playing behavior                                              |               |            |               |                     |            |
| An increase in dog's playing behavior                                             |               |            |               |                     |            |
| A decrease in dog's aggressive behavior                                           |               |            |               |                     |            |
| An increase in dog's aggressive behavior                                          |               |            |               |                     |            |
| A decrease in house littering behavior                                            |               |            |               |                     |            |
| An increase in house littering behavior                                           |               |            |               |                     |            |
| A decrease in dog's grooming behavior                                             |               |            |               |                     |            |
| An increase in dog's grooming behavior                                            |               |            |               |                     |            |
| A decrease in dog's reactivity level                                              |               |            |               |                     |            |
| An increase in dog's reactivity level                                             |               |            |               |                     |            |
| A decrease in dog's vocalization                                                  |               |            |               |                     |            |
| An increase in dog's vocalization                                                 |               |            |               |                     |            |
| A decrease in dog's fear of loud and sudden noises                                |               |            |               |                     |            |
| An increase in dog's fear of loud and sudden noises                               |               |            |               |                     |            |
|                                                                                   |               |            |               |                     |            |
| Changes in daily managing routine                                                 | Open question |            |               |                     |            |
| Changes in place where the dog sleeps                                             | Open question |            |               |                     |            |
| Changes in dog's sleep                                                            | Open question |            |               |                     |            |

| During the change of seasons, when the <b>temperature decreases</b> , do you observe: |           |            |               |                     |            |
|---------------------------------------------------------------------------------------|-----------|------------|---------------|---------------------|------------|
|                                                                                       | Never (1) | Rarely (2) | Sometimes (3) | Very frequently (4) | Always (5) |
| A decrease in walks frequency                                                         |           |            |               |                     |            |
| An increase in walks frequency                                                        |           |            |               |                     |            |

|                                                     |               |  |  |  |  |
|-----------------------------------------------------|---------------|--|--|--|--|
| A decrease of the walk's duration                   |               |  |  |  |  |
| An increase of the walk's duration                  |               |  |  |  |  |
| A decrease of dog's appetite                        |               |  |  |  |  |
| An increase of dog's appetite                       |               |  |  |  |  |
| A decrease in dog's activity level                  |               |  |  |  |  |
| An increase in dog's activity level                 |               |  |  |  |  |
| A decrease in dog's playing behavior                |               |  |  |  |  |
| An increase in dog's playing behavior               |               |  |  |  |  |
| A decrease in dog's aggressive behavior             |               |  |  |  |  |
| An increase in dog's aggressive behavior            |               |  |  |  |  |
| A decrease in house littering behavior              |               |  |  |  |  |
| An increase in house littering behavior             |               |  |  |  |  |
| A decrease in dog's grooming behavior               |               |  |  |  |  |
| An increase in dog's grooming behavior              |               |  |  |  |  |
| A decrease in dog's reactivity level                |               |  |  |  |  |
| An increase in dog's reactivity level               |               |  |  |  |  |
| A decrease in dog's vocalization                    |               |  |  |  |  |
| An increase in dog's vocalization                   |               |  |  |  |  |
| A decrease in dog's fear of loud and sudden noises  |               |  |  |  |  |
| An increase in dog's fear of loud and sudden noises |               |  |  |  |  |
|                                                     |               |  |  |  |  |
| Changes in daily managing routine                   | Open question |  |  |  |  |
| Changes in place where the dog sleeps               | Open question |  |  |  |  |
| Changes in dog's sleep                              | Open question |  |  |  |  |

| During <b>thunderstorms with heavy rainfall</b> , do you observe: |           |            |               |                     |            |
|-------------------------------------------------------------------|-----------|------------|---------------|---------------------|------------|
|                                                                   | Never (1) | Rarely (2) | Sometimes (3) | Very frequently (4) | Always (5) |
| A decrease in walks frequency                                     |           |            |               |                     |            |
| An increase in walks frequency                                    |           |            |               |                     |            |
| A decrease of the walk's duration                                 |           |            |               |                     |            |
| An increase of the walk's duration                                |           |            |               |                     |            |
| A decrease of dog's appetite                                      |           |            |               |                     |            |
| An increase of dog's appetite                                     |           |            |               |                     |            |
| A decrease in dog's activity level                                |           |            |               |                     |            |
| An increase in dog's activity level                               |           |            |               |                     |            |
| A decrease in dog's playing behavior                              |           |            |               |                     |            |
| An increase in dog's playing behavior                             |           |            |               |                     |            |

|                                                     |               |  |  |  |  |
|-----------------------------------------------------|---------------|--|--|--|--|
| A decrease in dog's aggressive behavior             |               |  |  |  |  |
| An increase in dog's aggressive behavior            |               |  |  |  |  |
| A decrease in house littering behavior              |               |  |  |  |  |
| An increase in house littering behavior             |               |  |  |  |  |
| A decrease in dog's grooming behavior               |               |  |  |  |  |
| An increase in dog's grooming behavior              |               |  |  |  |  |
| A decrease in dog's reactivity level                |               |  |  |  |  |
| An increase in dog's reactivity level               |               |  |  |  |  |
| A decrease in dog's vocalization                    |               |  |  |  |  |
| An increase in dog's vocalization                   |               |  |  |  |  |
| A decrease in dog's fear of loud and sudden noises  |               |  |  |  |  |
| An increase in dog's fear of loud and sudden noises |               |  |  |  |  |
|                                                     |               |  |  |  |  |
| Changes in daily managing routine                   | Open question |  |  |  |  |
| Changes in place where the dog sleeps               | Open question |  |  |  |  |
| Changes in dog's sleep                              | Open question |  |  |  |  |

## CAT QUESTIONNAIRE

| During the change of seasons, when the <b>temperature rises</b> , do you observe: |           |            |               |                     |            |
|-----------------------------------------------------------------------------------|-----------|------------|---------------|---------------------|------------|
|                                                                                   | Never (1) | Rarely (2) | Sometimes (3) | Very frequently (4) | Always (5) |
| A decrease in cat's access to the outside of the house                            |           |            |               |                     |            |
| An increase in cat's access to the outside of the house                           |           |            |               |                     |            |
| A decrease of cat's appetite                                                      |           |            |               |                     |            |
| An increase of cat's appetite                                                     |           |            |               |                     |            |
| A decrease in cat's activity level                                                |           |            |               |                     |            |
| An increase in cat's activity level                                               |           |            |               |                     |            |
| A decrease in cat's playing behavior                                              |           |            |               |                     |            |
| An increase in cat's playing behavior                                             |           |            |               |                     |            |
| A decrease in cat's aggressive behavior                                           |           |            |               |                     |            |
| An increase in cat's aggressive behavior                                          |           |            |               |                     |            |
| A decrease in house littering behavior                                            |           |            |               |                     |            |
| An increase in house littering behavior                                           |           |            |               |                     |            |
| A decrease in cat's grooming behavior                                             |           |            |               |                     |            |
| An increase in cat's grooming behavior                                            |           |            |               |                     |            |
| A decrease in cat's reactivity level                                              |           |            |               |                     |            |

|                                                     |               |  |  |  |  |
|-----------------------------------------------------|---------------|--|--|--|--|
| An increase in cat's reactivity level               |               |  |  |  |  |
| A decrease in cat's vocalization                    |               |  |  |  |  |
| An increase in cat's vocalization                   |               |  |  |  |  |
| A decrease in cat's fear of loud and sudden noises  |               |  |  |  |  |
| An increase in cat's fear of loud and sudden noises |               |  |  |  |  |
|                                                     |               |  |  |  |  |
| Changes in daily managing routine                   | Open question |  |  |  |  |
| Changes in place where the cat sleeps               | Open question |  |  |  |  |
| Changes in cat's sleep                              | Open question |  |  |  |  |

| During the change of seasons, when the <b>temperature decreases</b> , do you observe: |               |            |               |                     |            |
|---------------------------------------------------------------------------------------|---------------|------------|---------------|---------------------|------------|
|                                                                                       | Never (1)     | Rarely (2) | Sometimes (3) | Very frequently (4) | Always (5) |
| A decrease in cat's access to the outside of the house                                |               |            |               |                     |            |
| An increase in cat's access to the outside of the house                               |               |            |               |                     |            |
| A decrease of cat's appetite                                                          |               |            |               |                     |            |
| An increase of cat's appetite                                                         |               |            |               |                     |            |
| A decrease in cat's activity level                                                    |               |            |               |                     |            |
| An increase in cat's activity level                                                   |               |            |               |                     |            |
| A decrease in cat's playing behavior                                                  |               |            |               |                     |            |
| An increase in cat's playing behavior                                                 |               |            |               |                     |            |
| A decrease in cat's aggressive behavior                                               |               |            |               |                     |            |
| An increase in cat's aggressive behavior                                              |               |            |               |                     |            |
| A decrease in house littering behavior                                                |               |            |               |                     |            |
| An increase in house littering behavior                                               |               |            |               |                     |            |
| A decrease in cat's grooming behavior                                                 |               |            |               |                     |            |
| An increase in cat's grooming behavior                                                |               |            |               |                     |            |
| A decrease in cat's reactivity level                                                  |               |            |               |                     |            |
| An increase in cat's reactivity level                                                 |               |            |               |                     |            |
| A decrease in cat's vocalization                                                      |               |            |               |                     |            |
| An increase in cat's vocalization                                                     |               |            |               |                     |            |
| A decrease in cat's fear of loud and sudden noises                                    |               |            |               |                     |            |
| An increase in cat's fear of loud and sudden noises                                   |               |            |               |                     |            |
|                                                                                       |               |            |               |                     |            |
| Changes in daily managing routine                                                     | Open question |            |               |                     |            |
| Changes in place where the cat sleeps                                                 | Open question |            |               |                     |            |
| Changes in cat's sleep                                                                | Open question |            |               |                     |            |

| During <b>thunderstorms with heavy rainfall</b> , do you observe: |               |            |               |                     |            |
|-------------------------------------------------------------------|---------------|------------|---------------|---------------------|------------|
|                                                                   | Never (1)     | Rarely (2) | Sometimes (3) | Very frequently (4) | Always (5) |
| A decrease in cat's access to the outside of the house            |               |            |               |                     |            |
| An increase in cat's access to the outside of the house           |               |            |               |                     |            |
| A decrease of cat's appetite                                      |               |            |               |                     |            |
| An increase of cat's appetite                                     |               |            |               |                     |            |
| A decrease in cat's activity level                                |               |            |               |                     |            |
| An increase in cat's activity level                               |               |            |               |                     |            |
| A decrease in cat's playing behavior                              |               |            |               |                     |            |
| An increase in cat's playing behavior                             |               |            |               |                     |            |
| A decrease in cat's aggressive behavior                           |               |            |               |                     |            |
| An increase in cat's aggressive behavior                          |               |            |               |                     |            |
| A decrease in house littering behavior                            |               |            |               |                     |            |
| An increase in house littering behavior                           |               |            |               |                     |            |
| A decrease in cat's grooming behavior                             |               |            |               |                     |            |
| An increase in cat's grooming behavior                            |               |            |               |                     |            |
| A decrease in cat's reactivity level                              |               |            |               |                     |            |
| An increase in cat's reactivity level                             |               |            |               |                     |            |
| A decrease in cat's vocalization                                  |               |            |               |                     |            |
| An increase in cat's vocalization                                 |               |            |               |                     |            |
| A decrease in cat's fear of loud and sudden noises                |               |            |               |                     |            |
| An increase in cat's fear of loud and sudden noises               |               |            |               |                     |            |
|                                                                   |               |            |               |                     |            |
| Changes in daily managing routine                                 | Open question |            |               |                     |            |
| Changes in place where the cat sleeps                             | Open question |            |               |                     |            |
| Changes in cat's sleep                                            | Open question |            |               |                     |            |
